1 **Differential responses of antioxidants and dehydrin expression in two**  
2 **switchgrass (*Panicum virgatum*) cultivars contrasting in drought**  
3 **tolerance**

4  
5  
6 **Running title:** Switchgrass drought Tolerance and Antioxidant

7  
8 Yiming Liu<sup>#1,2</sup>, Guofu Hu<sup>#3,2</sup>, Guoqiang Wu<sup>4,5</sup>, Guodao Liu<sup>1</sup>, Hengfu Huan<sup>1</sup>, Xipeng Ding<sup>1</sup>,  
9 Linling Yan<sup>1</sup>, Xinyong Li<sup>1</sup>, Bingyu Zhao<sup>5\*</sup>, Xunzhong Zhang<sup>2\*</sup>

10  
11 <sup>1</sup>*Tropical Crops Genetic Resources Institute, Chinese Academy of Tropical Agricultural Sciences*  
12 *(CATAS) / Key Laboratory of Crop Gene Resources and Germplasm Enhancement in Southern*  
13 *China, Ministry of Agriculture, Hainan Danzhou 571737, P.R. China*

14 <sup>2</sup>*Department of Crop and Soil Environmental Science, Virginia Tech, Blacksburg, VA, USA*

15 <sup>3</sup>*College of Animal Science and Technology, Northeast Agricultural University, Harbin,*  
16 *Heilongjiang Province, China*

17 <sup>4</sup>*School of Life Science and Engineering, Lanzhou University of Technology, Lanzhou730050,*  
18 *P.R.China*

19 <sup>5</sup>*Department of Horticulture, Virginia Tech, Blacksburg, VA, USA*

20  
21 \*Corresponding authors: Xunzhong Zhang (Email: [xuzhang@vt.edu](mailto:xuzhang@vt.edu), Phone: 540-231-9788, Fax:  
22 540- 231-3431), and Bingyu Zhao (Email: [bzhao07@vt.edu](mailto:bzhao07@vt.edu), Phone: 540-231-1146, Fax: 540-  
23 231-3083)

24 # These authors contributed equally to this work and should be considered co-first authors

25

26 **Types of papers:** Original Research Articles

27

28 **Abstract**

29 Drought stress is a major limiting factor for plant growth and development in many regions of the  
30 world. This study was designed to investigate antioxidant metabolism and dehydrin expression  
31 responses to drought stress in two switchgrass cultivars (drought tolerant Alamo, and drought  
32 sensitive Dacotah) contrasting in drought tolerance. The plants were subjected to well-watered  
33 [100% evapotranspiration (ET)] or drought stress (30%-50% ET) conditions for up to 24 d in  
34 growth chambers. Drought stress decreased leaf relative water content (RWC), increased leaf  
35 electrolyte leakage (EL), leaf malondialdehyde (MDA) content in two cultivars, but Alamo  
36 exhibited higher leaf RWC level, lower leaf EL and MDA when compared to Dacotah at 24 d of  
37 drought treatment. Drought stress also increased superoxide dismutase (SOD), catalase (CAT) and  
38 ascorbate peroxidase (APX) activities in two cultivars, Alamo had relatively higher SOD, CAT  
39 and APX activities and greater abundance of SOD and APX isozymes than Dacotah at 24 d of  
40 drought treatment. Alamo had higher abundance of 55 KDa and 18 KDa dehydrin accumulation  
41 than Dacotah under drought treatment. Relative genes expression level of *PvCAT1*, *PvAPX2*,  
42 *PvERD* and *PvPIP1;5* in Alamo were significantly higher than Dacotah at 24 d of drought  
43 treatment. These results suggest that increase in antioxidant enzymes and accumulation of  
44 dehydrin were highly related with switchgrass drought tolerance. Antioxidant enzyme activity,  
45 isozyme expression and dehydrin abundance could provide a useful screening tool to identify  
46 relative drought tolerance in switchgrass cultivars.

47

48 **Keywords:** *Panicum virgatum*, drought tolerance, antioxidant, dehydrin, gene expression

49

50

51

## 52 **Introduction**

53 Drought occurs in all climates and many parts of the world every year when sufficient water  
54 needed to sustain an area is not available, causing significantly impacts on plants growth,  
55 development and crop yield [1]. Worldwide losses in crop yields from drought probably exceed  
56 the losses from all other abiotic stress combined [2, 3]. Drought stresses cause oxidative stress by  
57 contributing to reactive oxygen species (ROS) such as superoxide radical ( $O^{\bullet-}_2$ ), hydrogen  
58 peroxide ( $H_2O_2$ ), hydroxyl radical ( $OH^{\bullet}$ ) and singlet oxygen ( $^1O_2$ ) [4]. ROS can seriously disrupt  
59 normal metabolism through oxidative damage to nucleic acids, lipids, protein and damage  
60 membrane function [5]. However, ROS may also serve as a transduction signal during drought  
61 stress and improve stress defense mechanisms of plant [6]. ROS levels that are too low or too high  
62 affect plant growth and development, maintaining ROS levels within a moderate range is important  
63 for plants [7, 8].

64 Plants have developed an antioxidant defense system in response to the high level of ROS [9].  
65 There are generally two repairing mechanisms that plants have developed to scavenge free ROS:  
66 (i) production of antioxidants or antioxidant enzymes that directly react with and scavenge ROS,  
67 including superoxide dismutase (SOD), catalase (CAT), ascorbate peroxidase (APX), peroxidase  
68 (POD), and a tocopherol; (ii) production of enzymes that regenerate oxidized antioxidants such as  
69 glutathione, glutathione reductase, ascorbate, and ascorbate reductase[10]. Previous studies  
70 provided correlative evidence that the enhanced drought tolerance of plant was associated with  
71 changes in antioxidant enzymes (SOD, POD, CAT, POX and GR) and maintenance of low  $H_2O_2$

72 levels [11-13]. It is known that organelles with a highly oxidizing metabolic activity or an intense  
73 rate of electron flow, such as chloroplasts, mitochondria, and microbodies, are major sources of  
74 ROS, different isoenzymes such as Cu/Zn-SOD, Fe-SOD, Mn-SOD, cytosol APX (cAPX), and  
75 microbody APX (mAPX) have been found in different organelles [14]. The antioxidant isozymes  
76 could be used as a biochemical marker to study the tolerance of plant to stress. Sen and  
77 Alikamanoglu [15] found that two new POX isozyme bands were detected in all drought-tolerant  
78 sugar beet mutants compared to the control, and the intensity of Fe-SOD, Cu/Zn-SOD, CAT and  
79 APX isozymes were detected at different intensities among the drought-tolerant sugar beet mutants.  
80 Recent study found that a new CuZn SOD isozyme OsCSD3 which encoded by LOC\_Os03g11960  
81 of rice, was up-regulated in response to drought, oxidative stress and salt [16].

82 Dehydrin (DHN) is a multi-family of proteins present in plants that are produced in response  
83 to cold and drought stress. DHNs are hydrophilic and reliably thermostable. They are stress  
84 proteins with a high number of charged amino acids that belong to the Group II Late  
85 Embryogenesis Abundant (LEA) family [17, 18]. DHNs have been divided into five subclasses  
86 based on their conserved amino acid sequences: the Y, S and K segments and include YnSKn,  
87 SKn, Kn, YnKn and KnS sub-types[19]. It has been reported that the expression of DHN is  
88 positively correlated with the tolerance to cold, drought, and salt stress [20]. DHNs play an  
89 important protective role during cellular dehydration. The accumulation of DHNs was observed  
90 in roots, leaves, coleoptiles, crowns and seeds under drought stress [21].

91 Switchgrass (*Panicum virgatum*) was selected as a model bioenergy crop in the United States  
92 [22]. To avoid competition of arable lands with food crops, switchgrass will be mainly grown on  
93 marginal lands, where millions of hectares of these lands are drought-affected [23]. Two distinct  
94 switchgrass ecotypes are generally defined based on morphological characteristics and habitat:

95 lowland and upland. Lowland ecotypes are mostly tetraploid ( $2n = 4 \times = 36$ ) while upland ecotypes  
96 are mainly octaploid ( $2n = 8 \times = 72$ ) or hexaploid ( $2n = 6 \times = 54$ ) [24]. Lowland ecotypes are taller  
97 and higher biomass yield, whereas upland ecotypes are shorter and less biomass yield [25].  
98 Improving switchgrass yield under drought stress is one of the most important goals of plant  
99 breeding. Our previous study have found that switchgrass exhibits a wide range of genetic  
100 variability in drought tolerance, Alamo ranked # 4 in drought tolerance and Dacotah ranked # 48  
101 among 49 switchgrass lines [26]. However, limited information is available on the gene  
102 expressions in conjunction with antioxidant and dehydrin responses and isozyme alterations under  
103 drought tolerance in switchgrass. Identifying and understanding the function of antioxidant  
104 defense mechanisms are important for developing drought tolerant switchgrass plants. The  
105 objectives of this study were to determine whether drought resistance of switchgrass cultivars  
106 could be associated with antioxidant metabolism and dehydrin expression levels.

107

## 108 **Materials and methods**

### 109 **Plant materials and culture**

110 Two cultivars Alamo and Dacotah were examined in this study. Each switchgrass line was  
111 propagated by splitting tillers on Mar, 10, 2014. Five tillers from each line were transplanted into  
112 plastic pots (17 cm diam., 20 cm high, with four holes at the bottom for drainage) filled with 3.5  
113 kg of a soil and sand mixture (soil:sand = 2:1 v/v, sand: 0.1-1.0 mm diam.). The plants were grown  
114 in greenhouse with temperatures of  $30 \pm 1$  °C/ $25 \pm 1$  °C (day/night), a 14-h photoperiod, 75% relative  
115 humidity, and with photosynthetically active radiation (PAR) of approximately  $500 \mu\text{mol m}^{-2}\text{s}^{-1}$   
116 (natural daylight supplemented with fluorescent lamps). The plants were irrigated daily, and  
117 fertilizer containing N (Bulldog brand, 28-8-18, 1% ammonia N, 4.8% nitrate N, and 22.2% urea

118 N; SQM North America, Atlanta, GA) and micronutrients was applied at 0.1 lb. 1000 ft<sup>-2</sup> every  
119 week.

120 After the plants were grown for two months and had reached the E5 developmental stage [27],  
121 then moved into a growth chamber for the experiment. The chamber was set at 30/25 °C (day/night  
122 temperature), 75% of relative humidity, 14 h photoperiod, and PAR at 500 μmol m<sup>-2</sup>s<sup>-1</sup>. Plants were  
123 fertilized once a week, and watered every two days until water drainage occurred at the bottom of  
124 the pot at each irrigation.

125

### 126 **Drought stress treatment**

127 In order to determine the soil water content (SWC) of each pot more quickly, an equation of  
128 linear regression between the SWC and volumetric soil moisture content (VWC) was made before  
129 the drought treatment. Soil of eight pots was oven dried at 105°C for 48 h to obtain their dry  
130 weights (DW). Then we added enough water to each pots, after 1 h when no water leaked from the  
131 bottom of the pots, fresh weight of each pot and VWC were measured with a soil moisture meter  
132 (model HH2, Delta-T Devices, Cambridge, England) and every three day thereafter. SWC was  
133 determined using the formula:  $SWC (\%) = (FW - DW) / DW \times 100$ . Then we got an equation of linear  
134 regression between the SWC and VWC (Supplemental table 1).

135 Plants were allowed to acclimate to growth chamber conditions for one week before drought  
136 treatments were imposed. Each line were randomly assigned to either the control group (n=4),  
137 which was kept well-watered (100% ET), or to the drought treatment group (n=4), in which the  
138 soil moisture was allowed to progressively decline from 0 d to 24 d. Each pots of drought treatment  
139 were weighted every two days and VWC were also collected, then SWC was calculated by the  
140 equation we got above (Supplemental table 1), the water needed to add of each pot was calculated

141 to compensate for 30%-50% ET during the experiment over the 24 d period (Fig. 1).

142

### 143 **Physiological measurements**

144 Leaf samples were collected for electrolyte leakage (EL) and relative water content (RWC)  
145 measurements at day 0, 6, 12, 18 and 24 of drought stress. Leaf tissues were also sampled, frozen  
146 with liquid N, and used for antioxidant enzyme and dehydrin analysis.

147 Leaf electrolyte leakage (EL) was measured according to the method of Marcum [28] with  
148 some modifications. The top 2<sup>nd</sup> or 3<sup>rd</sup> mature leaf blades were excised and cut into 2 cm segments.  
149 After being rinsed 3 times with deionized H<sub>2</sub>O, 0.2 g leaf segments were placed in a test tube  
150 containing 20 mL deionized H<sub>2</sub>O. The test tubes were agitated on a shaker for about 24 h and the  
151 solution conductivity (C<sub>1</sub>) was measured with a conductivity meter (SR60IC, VWR, Radnor, PA).  
152 Leaf samples were then autoclaved at 120 °C for 30 min, and the conductivity of the solution  
153 containing killed tissue was measured once the tubes were cooled down to room temperature (C<sub>2</sub>).  
154 The relative EL was calculated using the formula:  $EL (\%) = (C_1 / C_2) \times 100$ .

155 Leaf relative water content (RWC) was determined according to the method of Barrs and  
156 Weatherley [29]. The Leaf RWC was calculated based on the following formula:  $RWC = (FW -$   
157  $DW) / (TW - DW) \times 100$ , where FW is leaf fresh weight, DW is the dry weight of leaves after  
158 drying at 85 °C for 3 d, and TW is the turgid weight of leaves after soaking in distilled water for  
159 24 h at 20 °C.

160

### 161 **Antioxidant enzyme activity**

162 Frozen leaf samples were ground in liquid nitrogen and homogenized in 50 mM sodium  
163 phosphate buffer (pH 7.0) containing 2 mM EDTA, 5 mM β-mercaptoethanol and 4% (w/v)

164 polyvinylpyrrolidone-40 (PVP-40). The homogenate was centrifuged at 12,000×g for 30 min at  
165 4 °C. The supernatant was used for assay of the antioxidant enzymes CAT, APX, and SOD.

166 Total SOD activity was determined by measuring its ability to inhibit the photochemical  
167 reduction of nitro blue tetrazolium (NBT) according to the method of Giannopolitis and Ries [30]  
168 with minor modifications. The reaction solution (1 mL) contained 50 mM phosphate buffer (pH  
169 7.8), 0.1 mM EDTA, 13 mM methionine, 65 μM NBT and 1.3 μM riboflavin, and 30 μL SOD  
170 extract. A solution containing no enzyme solution was used as the control. Test tubes were  
171 irradiated under fluorescent lights 60 μmol·m<sup>-2</sup>·s<sup>-1</sup>) at 25 °C for 10 min. The absorbance of each  
172 solution was measured at 560 nm using a spectrophotometer, and one unit of enzyme activity was  
173 defined as the amount of enzyme that would inhibit 50% of NBT photoreduction.

174 The CAT activity was determined using the method of Chance and Maehly[31] with  
175 modifications. For CAT, the reaction solution (1 mL) contained 50 mM phosphate buffer (pH 7.0),  
176 15 mM H<sub>2</sub>O<sub>2</sub>, and 30 μL of extract. The reaction was initiated by adding the enzyme extract.  
177 Changes in absorbance at 240 nm were read in 1 min using a spectrophotometer ( $\epsilon = 39.4 \text{ M}^{-1} \text{ cm}^{-1}$ ).  
178 <sup>1</sup>).

179 The APX activity was assayed by recording the decrease in absorbance at 290 nm for 1 min.  
180 The 1.5-mL reaction mixture contained 50 mM potassium phosphate buffer (pH 7.0), 0.5 mM  
181 ascorbic acid, 0.1 mM EDTA, 0.1 mM H<sub>2</sub>O<sub>2</sub>, and 0.15 mL of enzyme. The reaction was started  
182 with the addition of 0.1 mM H<sub>2</sub>O<sub>2</sub> [32].

183

#### 184 **Lipid peroxidation**

185 Lipid peroxidation was measured in term of leaf MDA content [33]. A 1 ml aliquot of  
186 supernatant was mixed with 4 mL of 20% trichloroacetic acid containing 0.5% thiobarbituric acid.



187 The mixture was heated at 100 °C for 30 min, quickly cooled, and then centrifuged at 10000 g for  
188 10 min. The absorbance of the supernatant was read at 532 nm. The unspecific turbidity was  
189 corrected by A600 subtracting from A530. The concentration of MDA was calculated using an  
190 extinction coefficient of 155 mM<sup>-1</sup> cm<sup>-1</sup>.

191

## 192 **Antioxidant isozymes**

193 The procedure of protein extraction was the same as for antioxidant enzymes. The extracts (15  
194 µL) for SOD and APX were loaded on each gel. Native polyacrylamide gel electrophoresis (PAGE)  
195 was performed using a Mini-Protean system (Bio-Rad Laboratories, Hercules, CA) at 4 °C, 120 V  
196 for 90 min, except that SDS was omitted. For SOD and APX, enzyme extracts were subjected to  
197 native PAGE with 10% resolving gel and 3% stacking gel and CAT was detected on 7% resolving  
198 gel and 4% stacking gel.

199 The total activity of SOD was revealed using the method of Beauchamp and Fridovich[34] with  
200 some modifications. The gels were incubated in 50 mM potassium phosphate buffer (pH 7.5)  
201 containing 2.5 mM NBT in dark for 25 min. After being washed twice with the same buffer, the  
202 gels were soaked in 50 mM potassium phosphate buffer (pH 7.5) containing 30 µM riboflavin and  
203 0.4% N,N,N,N-tetramethylethylenediamine 235 (TEMED) in the dark for 40 min. The gels were  
204 then illuminated for 10 min with gentle agitation until appearance of enzyme bands and were  
205 transferred to 1% (v/v) acetic acid to stop the reaction.

206 The activity of APX was detected using the method of Lopez-Huertas *et al.* [35] with some  
207 modifications. The gels were pre-incubated in 50 mM sodium phosphate buffer with 4 mM  
208 ascorbate and 2 mM H<sub>2</sub>O<sub>2</sub> for 20 min. After briefly being washed with 50 mM potassium  
209 phosphate buffer (pH 7.0), the gels were stained in 50 mM potassium phosphate buffer (pH 7.8)

210 containing 28 mM TEMED and 1.25 mM NBT until the bands were clearly visible. The gels were  
211 then washed with distilled water to stop the reaction.

212

### 213 **SDS-PAGE and western blot**

214 Frozen leaf samples were ground in liquid nitrogen and re-suspended in 100  $\mu$ l 3  $\times$  Laemmli  
215 buffer containing 16%  $\beta$ -mercaptoethanol. The tissue was then boiled for 10 min and pelleted at a  
216 high speed for 10 min. Twenty micro liters of protein extract was applied to and separated on a 10%  
217 SDS-PAGE gel. The proteins were blotted to a PVDF membrane using a Bio-Rad Trans-Blot R  
218 TurboTM Transfer System. The membrane was blocked with 5% nonfat skim milk in 1  $\times$  Tris-  
219 saline buffer supplemented with 0.5% Tween20 (1  $\times$  TBST). After a brief rinse with TBS, the  
220 membrane was incubated in TBS with a dehydrin polyclonal antibody raised from rabbit (Assay  
221 Designs) at a dilution of 1:250 for 1.5 h. Next, the membrane was rinsed in TBS containing 0.5%  
222 Tween 20 (TBS-T) four times and then placed for 1 h in a solution of goat antirabbit IgG (dilution  
223 1:17500) conjugated to alkaline phosphatase (Sigma). The membrane was rinsed in TBS-T four  
224 times. The chemiluminescent signals were exposed to autoradiography film (Genesee Scientific,  
225 San Diego, CA) using a Kodak film processor SuperSignal West Pico Chemiluminescent Substrate  
226 (Prod # 1856136, Thermo Scientific).

227

### 228 **RNA extraction and quantitative reverse transcription PCR (qRT-PCR)**

229 Total RNA was extracted from 150 mg of leaf tissue using RNeasy plant mini RNA kit (50) (Qiagen,  
230 Valencia, CA), and RNA samples were further treated with DNase (Promega, Madison, WI, USA)  
231 to eliminate DNA contamination. Integrity of RNA was confirmed with miniaturized gel  
232 electrophoresis with the Agilent Bioanalyzer (Agilent Technologies, Inc., Santa Clara, CA). cDNA

233 was synthesized using the DyNAmo cDNA Synthesis Kit (New England Biolabs, Ipswich, MA,  
234 USA). The qRT-PCR analysis primer pairs of the corresponding genes were designed according to  
235 sequences obtained from the Phytozyme website (Supplemental table 2). Each 20- $\mu$ l reaction,  
236 which contained 15 ng of random hexamers/ $\mu$ l, 10 IU of Moloney murine leukemia virus RNase  
237 H<sup>+</sup> reverse transcriptase solution (Thermo Fisher Scientific), and appropriate buffer containing  
238 deoxynucleoside triphosphates (dNTPs) and MgCl<sub>2</sub> in a final concentration of 5 mM (1 $\times$ ; Thermo  
239 Fisher Scientific), was incubated at 25°C for 10 min and at 37°C for 30 min, inactivated at 85°C  
240 for 5 min, and finally chilled to 4°C. Two replicate RT reactions were made for each RNA sample.

241

## 242 **Experimental design and statistical analysis**

243 The experiment was a 4 $\times$ 2 factorial combination (two switchgrass cultivars, and two drought  
244 levels: well-watered and drought treatment) in a complete block design (one treatment of one  
245 species served as the block) with four replications. All data were subjected to analysis of  
246 variance (ANOVA, SAS 8.1, SAS Institute Inc., Cary, NC). The treatment means were separated  
247 using Fisher's protected least significant difference (LSD) test at 5% probability level.

248

## 249 **Results**

### 250 **Effects of drought stress on physiological parameters**

251 Drought stress reduced leaf RWC, increased leaf EL and MDA regardless of cultivars (Fig. 2, 3  
252 & 4). There were significant differences in leaf RWC, leaf EL and MDA in the two cultivars under  
253 drought stress conditions when compared to the controls at 18 d and 24 d. Leaf RWC, leaf EL and  
254 MDA of Dacotah decreased or increased sharply at both 18 d and 24 d of drought treatments.  
255 Alamo had a relatively higher leaf RWC and lower leaf EL and MDA than Dacotah at 12 d, 18 d

256 and 24 d of drought stress.

### 257 **Effects of drought stress on antioxidant enzymes activity**

258 SOD activity of both cultivars increased with the increasing duration of drought stress, with a  
259 larger extent in drought tolerant Alamo than sensitive Dacotah (Fig. 5). A significant increase in  
260 SOD was observed at 18 d and 24 d of drought treatment for two cultivars compared to their control.  
261 At 24 d of drought treatment, SOD of Alamo increased to  $150.0 \mu\text{mol min}^{-1} \text{mg}^{-1}$  protein, 3.65  
262 times of control, SOD of Dacotah increased to  $98.3 \mu\text{mol min}^{-1} \text{mg}^{-1}$  protein, 2.64 times of control,  
263 SOD of Alamo treatment was 1.53 times higher than Dacotah treatment.

264 CAT activity were progressively enhanced in the two cultivars with duration of drought stress  
265 compared to their control (Figs. 6), Alamo had greater CAT activity than Dacotah at 12, 18 and 24  
266 d of drought treatment, CAT of Alamo treatment at 24 d was 1.29 times higher than Dacotah  
267 treatment at 24 d.

268 APX had the same trend with SOD and CAT (Fig. 7). APX activity of both cultivars increased  
269 with the increasing duration of drought stress, the increase of Alamo was significantly higher than  
270 Dacotah especially at 24 d of drought treatment. At 24 d of drought treatment, APX of Alamo  
271 increased to  $73.4 \mu\text{mol min}^{-1} \text{mg}^{-1}$  protein, 2.01 times of control, APX of Dacotah increased to  
272  $49.8 \mu\text{mol min}^{-1} \text{mg}^{-1}$  protein, 1.54 times of control, SOD of Alamo treatment was 1.47 times  
273 higher than Dacotah treatment.

### 274 **Effects of drought stress on antioxidant isozyme**

275 Our activity staining visualized four SOD isozymes (SOD1-SOD4) in two cultivars (Fig. 8).  
276 Alamo and Dacotah increased SOD1 abundance under drought stress compared to control, both  
277 cultivars increased SOD2-SOD3 abundance under drought stress compared to control, however,  
278 only Dacotah decreased SOD4 abundance under drought stress compared to control. Alamo had

279 relative higher SOD3- SOD4 abundance in response to drought stress compared to Dacotah. Only  
280 one isoform of APX was identified in two cultivars (Fig. 9), both cultivars increased APX1  
281 abundance under drought stress compared to control, Alamo had relative higher APX1 abundance  
282 in response to drought stress when compared to Dacotah.

### 283 **Effects of drought stress on dehydrin**

284 Western blot showed that almost no dehydrin accumulation observed in control of both  
285 cultivars, however, drought stress significantly increased dehydrin accumulation in both cultivars  
286 at 24 d of drought treatment, Alamo had higher abundance of 53 KDa and 18 KDa dehydrin than  
287 Dacotah, no dehydrin accumulation of 18 KDa was found in Dacotah (Fig. 10).

### 288 **qRT-PCR of antioxidant, dehydrin, heat shock protein (HSP) and aquaporin**

289 qRT-PCR results showed that, the level of *PvSOD1*, *PvERD1*, *PvHSP90* and *PvPIP1;5* mRNA  
290 were significantly increased in both cultivars under drought treatment compared to their control,  
291 the level of *PvCAT1*, *PvAPX2* were significantly increased only in Alamo at 24 d of drought  
292 treatment compared to the control instead of Dacotah (Fig. 11). Whereas the increase of *PvSOD1*  
293 mRNA level in Dacotah was significant higher than Alamo at 24 d of drought stress, no  
294 significant difference in level of *PvHSP90* mRNA between Alamo and Dacotah at 24 d of drought  
295 stress.

296

### 297 **Discussion**

298 Our previous study found that, Alamo ranked #4 in drought tolerance and Dacotah ranked #48  
299 among 49 switchgrass lines, Alamo is a representative of good drought tolerant cultivars and  
300 Dacotah is a representative of drought sensitive ones [26]. The results of this study agreed with  
301 our previous study, showed that drought stress caused cellular and leaf damage to switchgrass as

302 indicated by decreased leaf RWC, increased EL and MDA. Alamo had higher RWC, *PvPIP1;5*  
303 relative gene expression level, lower EL and MDA content than Dacotah at 24 d of drought  
304 treatment, indicating that drought stress resulted in more severe damage to cell membranes in  
305 Dacotah relative to Alamo at 24 d of drought treatment.

306 When plants are subjected to water deficit, drought tolerant cultivars have better  $T_r$  and  $g_s$  and  
307 gas exchange and less oxidative stress, changes in antioxidants genes expression and activities  
308 may improve antioxidant defense system and ROS scavenging [36]. SOD is regarded as the key  
309 enzyme in the ROS scavenger system because it catalyzes superoxide free radical dismutation into  
310  $H_2O_2$  and  $O_2$ , which is the first step of scavenging ROS [37]. APX and POD scavenge  $H_2O_2$  and  
311 reduce ROS toxicity. In this study, we choose relative drought-tolerant cultivar Alamo, and relative  
312 drought-sensitive cultivar Dacotah to study the drought tolerance mechanisms of drought  
313 associated with antioxidant defense. Our results showed that, drought stress increase SOD, CAT  
314 and APX in two cultivars especially at 18 d and 24 d treatment. Alamo had significant higher SOD,  
315 CAT, APX activities and *PvAPX2*, *PvCAT1* relative gene expression level than Dacotah. R  
316 Khanna-Chopra *et al.* [38] found that drought-resistant wheat maintained favorable water relations  
317 and lower  $H_2O_2$  accumulation during severe water stress conditions due to systematic increase of  
318 antioxidants such as SOD, APX, CAT [39]. Pallavi Sharma *et al.* [11] reported that drought stress  
319 caused oxidative damage in rice species as exhibited by an increase in  $O^{\cdot-}_2$  and  $H_2O_2$ , but drought  
320 tolerant rice maintained higher antioxidant enzyme activities (SOD, APX) compared with drought-  
321 sensitive rice. These results indicated that antioxidant defense plays an important role in  
322 improvement of drought tolerance in plants, drought tolerant cultivars may have greater ROS-  
323 scavenging capacity to suppress ROS-induced injury during abiotic stress.

324 Antioxidant isozymes are known to play a vital role in plant drought tolerance. In this study,

325 antioxidant isozyme diversity of two switchgrass cultivars were investigated to identify band  
326 profiles as biochemical marker for the drought tolerance. Drought stress increased abundance of  
327 SOD1-SOD3 and APX1 isozyme in two cultivars at 24 d of drought stress, however, Dacotah had  
328 relatively lower SOD4 and APX1 abundance when compared to Alamo at 24 d of drought stress.  
329 The results of this study indicate that the drought tolerant cultivar Alamo had greater ability to  
330 scavenge ROS than the drought sensitive Dacotah. Our results agreed with the previous studies,  
331 which showed that various drought-tolerant plants present different isozyme patterns during  
332 drought stress conditions [40, 41].

333 Drought induced-accumulation of dehydrin proteins has been associated with drought tolerance  
334 in many plant species [42-44]. In this study, two dehydrin polypeptides (53 KDa and 18 KDa) were  
335 detected in Alamo under drought stress conditions at 24 d of drought treatment. Interestingly, only  
336 one dehydrin polypeptides (53 KDa) was detected in Dacotah, that could be caused by the different  
337 drought tolerant ability between the two cultivar under drought stress. Consistently, Alamo had  
338 significant higher *PvERD1* relative gene expression level than Dacotah.

339 In summary, drought stress caused damage to switchgrass as evidenced by decreased RWC,  
340 increased leaf EL and MDA content due to drought stress treatment. Alamo had relatively higher  
341 RWC, lower EL and less MDA content when compared to Dacotah at 24 d of drought stress. SOD,  
342 APX and CAT activities increased during drought stress at 18 d and 24 d. Alamo had higher SOD,  
343 APX and CAT activities, greater abundance of SOD1-SOD3 and APX1 isozyme than Dacotah  
344 under drought stress. Alamo had greater abundance of two dehydrin polypeptides (53 KDa and 18  
345 KDa) under drought stress conditions at 24 d than Dacotah. qRT-PCR showed that antioxidant  
346 gene *PvAPX2*, *PvCAT1*, dehydrin gene *PvERD1*, and aquaporin gene *PvPIPI;5* instead of heat  
347 shock protein gene *PvHSP90* and *PvSOD1*, are the key genes contribute to the drought tolerance

348 of Alamo, although Alamo had higher SOD activity and SOD isozyme abundance. Our results  
349 suggest antioxidant and dehydrin expression are associated with drought tolerance in switchgrass.  
350 Our results also suggest that selection and use of cultivars with greater antioxidant enzyme  
351 activities and more abundant isozymes under drought stress may be a practical approach to  
352 improve switchgrass drought tolerance.

353

### 354 **Acknowledgements**

355 This project was supported by grants from the “Hainan Provincial Natural Science Foundation of  
356 China (No. 318MS101)”, “Central Public-interest Scientific Institution Basal Research Fund for  
357 Chinese Academy of Tropical Agricultural Sciences (No. 1630032017085/1630032018020)”,  
358 “China Agriculture Research System (No. CARS-22-Z11) ”, “The Investigation of Forage  
359 Germplasms in South China (2017FY100600) ” and “The U.S. Department of Agriculture (XZ  
360 and BZ) the Office of Science (BER), U.S. Department of Energy (KC, RB, XZ, and BZ) ”.

361

### 362 **References**

- 363 1. Kaur G, Asthir B. Molecular responses to drought stress in plants. *Biol Plantarum*. 2017;61(2):201-9.
- 364 2. Van Bavel CHM. Water Relations of Plants and Soils. *Soil Science*. 1996;161(4):257-60.
- 365 3. Krame P. Plant water relations. Academic Press, New York. 1983.
- 366 4. Sharma P, Jha AB, Dubey RS, Pessarakli M. Reactive Oxygen Species, Oxidative Damage, and Antioxidative  
367 Defense Mechanism in Plants under Stressful Conditions. *Journal of Botany*. 2012.
- 368 5. Bailey-Serres J, Mittler R. The roles of reactive oxygen species in plant cells. *Plant Physiol*. 2006;141(2):311.
- 369 6. Noctor G, Mhamdi A, Foyer CH. The roles of reactive oxygen metabolism in drought: not so cut and dried. *Plant*  
370 *Physiol*. 2014;164(4):1636-48.
- 371 7. Mittler R. ROS Are Good. *Trends in Plant Science*. 2017;22(1):11-9. doi: 10.1016/j.tplants.2016.08.002.
- 372 8. Mignolet-Spruyt L, Xu E, Idänheimo N, Hoerberichts FA, Mühlenbock P, Brosché M, et al. Spreading the news:



- 373 subcellular and organellar reactive oxygen species production and signalling. J Exp Bot. 2016;67(13):3831-44. doi:  
374 10.1093/jxb/erw080. PubMed PMID: 26976816.
- 375 9. Bray EA. Plant responses to water deficit. Trends in Plant Science. 1997;2(2):48-54. doi: 10.1016/S1360-  
376 1385(97)82562-9.
- 377 10. Prochazkova D, Sairam RK, Srivastava GC, Singh DV. Oxidative stress and antioxidant activity as the basis of  
378 senescence in maize leaves. Plant Sci. 2001;161(4):765-71.
- 379 11. Sharma PD, R.S. Drought Induces Oxidative Stress and Enhances the Activities of Antioxidant Enzymes in  
380 Growing Rice Seedlings. Plant Growth Regulation. 2005;46(3):209-21.
- 381 12. Uzilday B, Turkan I, Sekmen AH, Ozgur R, Karakaya HC. Comparison of ROS formation and antioxidant  
382 enzymes in *Cleome gynandra* (C4) and *Cleome spinosa* (C3) under drought stress. Plant Sci. 2012;182:59-70. Epub  
383 2011/11/29.
- 384 13. Li Z, Peng Y, Huang B. Alteration of Transcripts of Stress-Protective Genes and Transcriptional Factors by  $\gamma$ -  
385 Aminobutyric Acid (GABA) Associated with Improved Heat and Drought Tolerance in Creeping Bentgrass (*Agrostis*  
386 *stolonifera*). Int J Mol Sci [Internet]. 2018; 19(6).
- 387 14. Ren J, Sun LN, Zhang QY, Song XS. Drought Tolerance Is Correlated with the Activity of Antioxidant Enzymes  
388 in *Cerasus humilis* Seedlings. Biomed Res Int. 2016;2016:9851095. doi: 10.1155/2016/9851095. PubMed PMID:  
389 27047966.
- 390 15. Sen A, Alikamanoglu S. Characterization of drought-tolerant sugar beet mutants induced with gamma radiation  
391 using biochemical analysis and isozyme variations. J Sci Food Agric. 2014;94(2):367-72. doi: 10.1002/jsfa.6393.  
392 PubMed PMID: 24037781.
- 393 16. Sanyal RP, Samant A, Prashar V, Misra HS, Saini A. Biochemical and functional characterization of OsCSD3, a  
394 novel CuZn superoxide dismutase from rice. Biochemical Journal. 2018. doi: 10.1042/bcj20180516.
- 395 17. Graether SP, Boddington KF. Disorder and function: a review of the dehydrin protein family. Frontiers in plant  
396 science [Internet]. 2014 2014; 5:[576 p.].
- 397 18. Hu L, Wang Z, Du H, Huang B. Differential accumulation of dehydrins in response to water stress for hybrid  
398 and common bermudagrass genotypes differing in drought tolerance. J Plant Physiol. 2010;167(2):103-9.
- 399 19. Lv A, Fan N, Xie J, Yuan S, An Y, Zhou P. Expression of CdDHN4, a Novel YSK2-Type Dehydrin Gene from  
400 Bermudagrass, Responses to Drought Stress through the ABA-Dependent Signal Pathway. Frontiers in Plant Science.

- 401 2017;8(748). doi: 10.3389/fpls.2017.00748.
- 402 20. Lopez CG, Banowetz GM, Peterson CJ, Kronstad WE. Dehydrin Expression and Drought Tolerance in Seven  
403 Wheat Cultivars. *Crop Science*. 2003;43:577-82. doi: 10.2135/cropsci2003.5770.
- 404 21. Han B, Kermode AR. Dehydrin-like proteins in castor bean seeds and seedlings are differentially produced in  
405 response to ABA and water-deficit-related stresses. *J Exp Bot*. 1996;47(7):933-9. doi: 10.1093/jxb/47.7.933.
- 406 22. McLaughlin SB, Adams Kszos L. Development of switchgrass (*Panicum virgatum*) as a bioenergy feedstock in  
407 the United States. *Biomass and Bioenergy*. 2005;28(6):515-35.
- 408 23. Jiang Y, Yao Y, Wang Y. Physiological response, cell wall components, and gene expression of switchgrass under  
409 short-term drought stress and recoveries. *Crop Sci*. 2012;52.
- 410 24. Hopkins AA, Taliaferro CM, Murphy CD, Christian DA. Chromosome Number and Nuclear DNA Content of  
411 Several Switchgrass Populations. *Crop Science*. 1996;36(5):1192-5.
- 412 25. Alexopoulou E, Sharma N, Papatheohari Y, Christou M, Piscioneri I, Panoutsou C, et al. Biomass yields for  
413 upland and lowland switchgrass varieties grown in the Mediterranean region. *Biomass and Bioenergy*.  
414 2008;32(10):926-33.
- 415 26. Liu Y, Zhang X, Tran H, Shan L, Kim J, Childs K, et al. Assessment of drought tolerance of 49 switchgrass  
416 (*Panicum virgatum*) genotypes using physiological and morphological parameters. *Biotechnology for Biofuels*.  
417 2015;8(1):152. doi: 10.1186/s13068-015-0342-8.
- 418 27. Hardin CF, Fu C, Hisano H, Xiao X, Shen H, Stewart CN, Jr., et al. Standardization of switchgrass sample  
419 collection for cell wall and biomass trait analysis. *BioEnergy Research*. 2013;6(2):755-62. doi: 10.1007/s12155-012-  
420 9292-1.
- 421 28. Marcum KB, Anderson SJ, Engelke MC. Salt gland ion secretion: a salinity tolerance mechanism among five  
422 zoysiagrass species. *Crop Sci*. 1998;38:806-10.
- 423 29. Barrs H, Weatherley P. A Re-Examination of the Relative Turgidity Technique for Estimating Water Deficits in  
424 Leaves. *Australian Journal of Biological Sciences*. 1962;15(3):413-28.
- 425 30. Giannopolitis CN RS. Superoxide dismutases, 1: Occurrence in higher plants [Corn, oats, peas]. *Plant Physiol*.  
426 1977;59:309-14.
- 427 31. Chance B, Maehly AC. Assay of catalases and peroxidases. *Methods in Enzymology*. 2: Academic Press; 1955.  
428 p. 764-75.

- 429 32. Nakano Y AK. Hydrogen peroxide scavenged by ascorbate-specific peroxidase in spinach chloroplasts. Plant  
430 Cell Physiol. 1981;22(5): 867–80.
- 431 33. Dhindsa RS, Plumb-Dhindsa P, Thorpe TA. Leaf Senescence: Correlated with Increased Levels of Membrane  
432 Permeability and Lipid Peroxidation, and Decreased Levels of Superoxide Dismutase and Catalase. J Exp Bot.  
433 1981;32(126):93-101.
- 434 34. Beauchamp C, Fridovich I. Superoxide dismutase: Improved assays and an assay applicable to acrylamide gels.  
435 Analytical Biochemistry. 1971;44(1):276-87.
- 436 35. Lopez-Huertas E, Corpas FJ, Sandalio LM, Del Rio LA. Characterization of membrane polypeptides from pea  
437 leaf peroxisomes involved in superoxide radical generation. The Biochemical journal. 1999;337 ( Pt 3):531-6. Epub  
438 1999/01/23. PubMed PMID: 9895298; PubMed Central PMCID: PMC1220006.
- 439 36. Bartosz G. Oxidative stress in plants. Acta Physiol Plant. 1997;19(1):47-64. doi: 10.1007/s11738-997-0022-9.
- 440 37. Bowler C, Montagu MV, Inze D. Superoxide Dismutase and Stress Tolerance. Annual Review of Plant  
441 Physiology and Plant Molecular Biology. 1992;43(1):83-116. doi: doi:10.1146/annurev.pp.43.060192.000503.
- 442 38. R Khanna-Chopra DS. Acclimation to drought stress generates oxidative stress tolerance in drought-resistant  
443 than -susceptible wheat cultivar under field conditions. Environmental & Experimental Botany. 2007;60(2):276-83.
- 444 39. Selote DS, Khanna-Chopra R. Antioxidant response of wheat roots to drought acclimation. Protoplasma.  
445 2010;245(1-4):153-63. Epub 2010/06/19. doi: 10.1007/s00709-010-0169-x. PubMed PMID: 20559854.
- 446 40. Zhang X, Ervin EH, Liu Y, Hu G, Shang C, Fukao T, et al. Differential Responses of Antioxidants, Abscisic Acid,  
447 and Auxin to Deficit Irrigation in Two Perennial Ryegrass Cultivars Contrasting in Drought Tolerance. Journal of the  
448 American Society for Horticultural Science. 2015;140(6):562-72.
- 449 41. Luo N, Yu X, Nie G, Liu J, Jiang Y. Specific peroxidases differentiate *Brachypodium distachyon* accessions and  
450 are associated with drought tolerance traits. Ann Bot-London. 2016;118(2):259-70. doi: 10.1093/aob/mcw104.
- 451 42. Hassan NM, El-Bastawisy ZM, El-Sayed AK, Ebeed HT, Nemat Alla MM. Roles of dehydrin genes in wheat  
452 tolerance to drought stress. J Adv Res. 2015;6(2):179-88. doi: 10.1016/j.jare.2013.11.004. PubMed PMID: 25750752.
- 453 43. Verma G, Dhar YV, Srivastava D, Kidwai M, Chauhan PS, Bag SK, et al. Genome-wide analysis of rice dehydrin  
454 gene family: Its evolutionary conservedness and expression pattern in response to PEG induced dehydration stress.  
455 Plos One [Internet]. 2017 2017; 12(5):[e0176399 p.].
- 456 44. Kumar M, Lee S-C, Kim J-Y, Kim S-J, Aye SS, Kim S-R. Over-expression of dehydrin gene, *OsDhn1*, improves

457 drought and salt stress tolerance through scavenging of reactive oxygen species in rice (*Oryza sativa* L.). J Plant Biol.

458 2014;57(6):383-93. doi: 10.1007/s12374-014-0487-1.

459

460

461 **Figure legends**

462 Fig.1. Effects of drought stress on soil water content (SWC). Vertical bars indicate LSD value  
463 (P=0.05).

464 Fig. 2. Effects of drought stress on leaf electrolyte leakage (EL) of two switchgrass cultivars Alamo  
465 and Dacotah. Vertical bars indicate LSD value (P=0.05).

466 Fig.3. Effects of drought stress on relative water content (RWC) of two switchgrass cultivars  
467 Alamo and Dacotah. Vertical bars indicate LSD value (P=0.05).

468 Fig. 4. Effects of drought stress on malondialdehyde (MDA) of two switchgrass cultivars Alamo  
469 and Dacotah. Vertical bars indicate LSD value (P=0.05).

470 Fig. 5. Effects of drought stress on superoxide dismutase (SOD) of two switchgrass cultivars  
471 Alamo and Dacotah. Vertical bars indicate LSD value (P=0.05).

472 Fig. 6. Effects of drought stress on ascorbate catalase (CAT) of two switchgrass cultivars Alamo  
473 and Dacotah. Vertical bars indicate LSD value (P=0.05).

474 Fig. 7. Effects of drought stress on ascorbate peroxidase (APX) of two switchgrass cultivars Alamo  
475 and Dacotah. Vertical bars indicate LSD value (P=0.05).

476 Fig. 8. Changes in superoxide dismutase (SOD) isoforms of two switchgrass cultivars Alamo and  
477 Dacotah under control (well-watered) and drought stress conditions (24 d). Equal amounts (15  
478  $\mu$ L) were loaded in each lane.

479 Fig. 9. Changes in ascorbate peroxidase (APX) isoforms of two switchgrass cultivars Alamo and  
480 Dacotah under control (well-watered) and drought stress conditions (24 d). Equal amounts (15  
481  $\mu$ L) were loaded in each lane.

482 Fig. 10. Immunoblots of dehydrin expression in two switchgrass cultivars Alamo and Dacotah  
483 under drought stress (24 d).

484 Fig. 11. Relative transcript levels of *PvAPX2*, *PvCAT1*, *PvERD1*, *PvHSP90*, *PvSOD1* and  
485 *PvPIP1;5* genes of two switchgrass cultivars (drought-tolerant Alamo and drought-sensitive  
486 Dacotah) under well-watered and drought stress (24 d). Each bar represents the mean of three  
487 independent replicates with standard error. Different letters of a-c indicates the statistic  
488 difference at 0.05 level.

489

490

491

492

493

494

495

496

497

498

499

500

501

502

503

504

505

506

507 Fig.1.

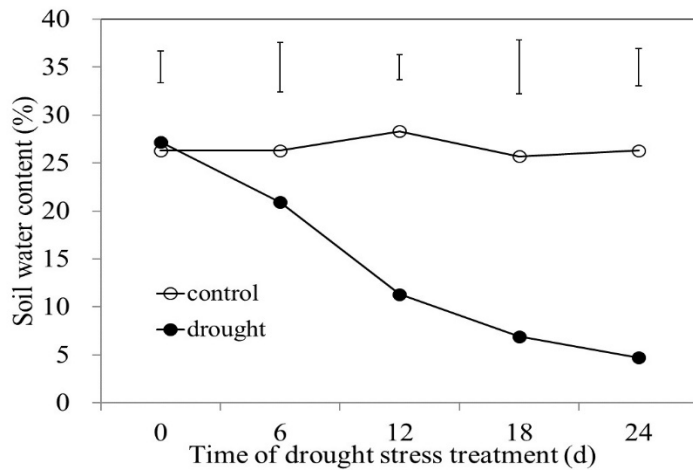

508

509 Fig.2.

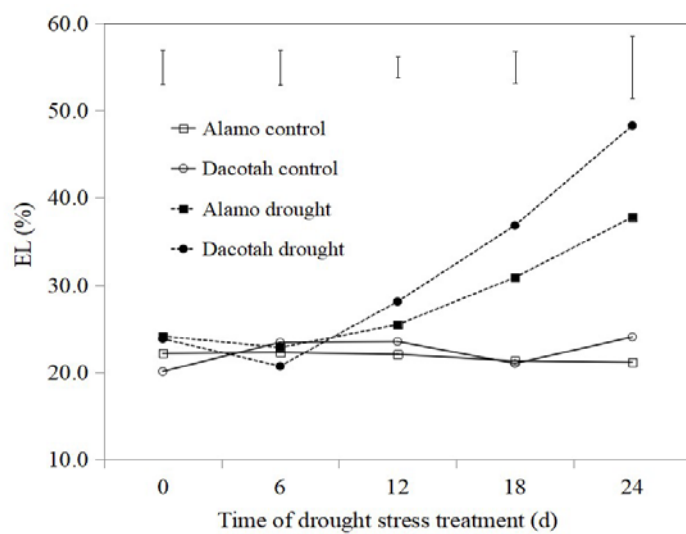

510

511

512

513

514

515

516

517

518 Fig.3.

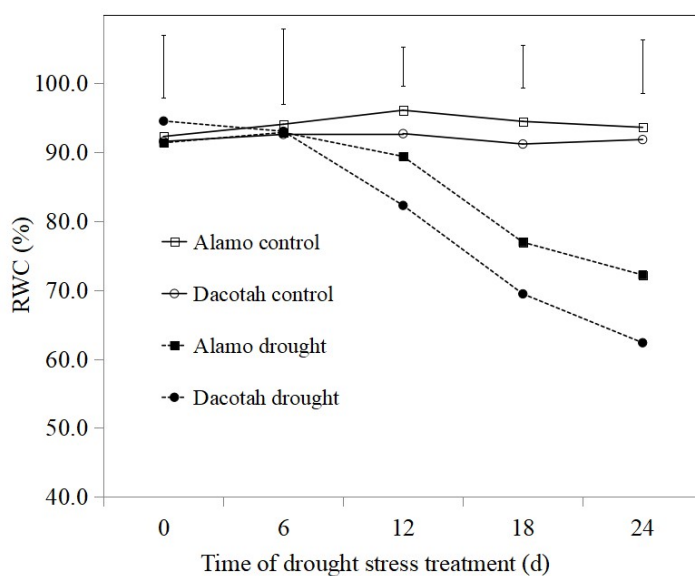

519

520 Fig.4.

521

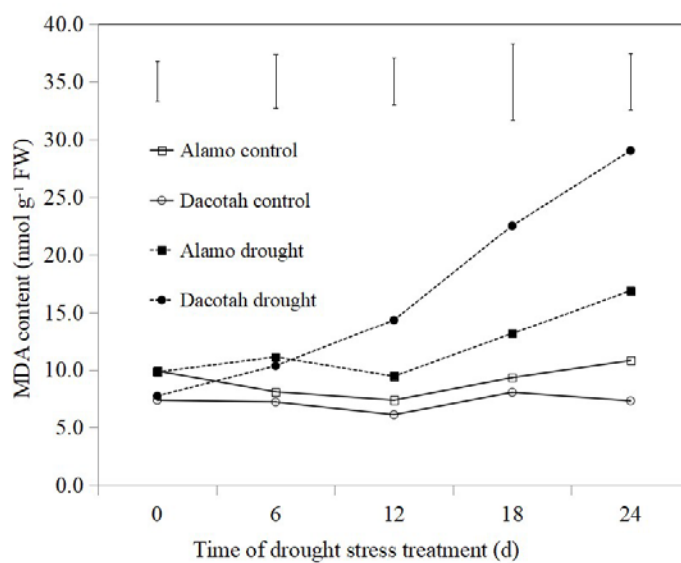

522

523

524

525

526



527 Fig.5.

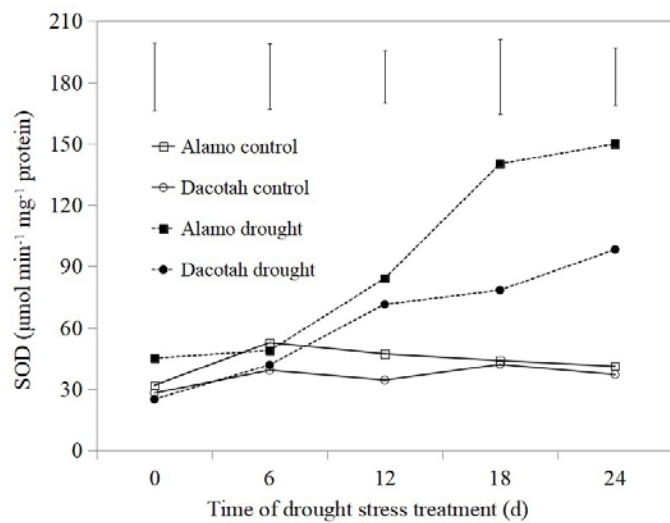

528

529 Fig.6.

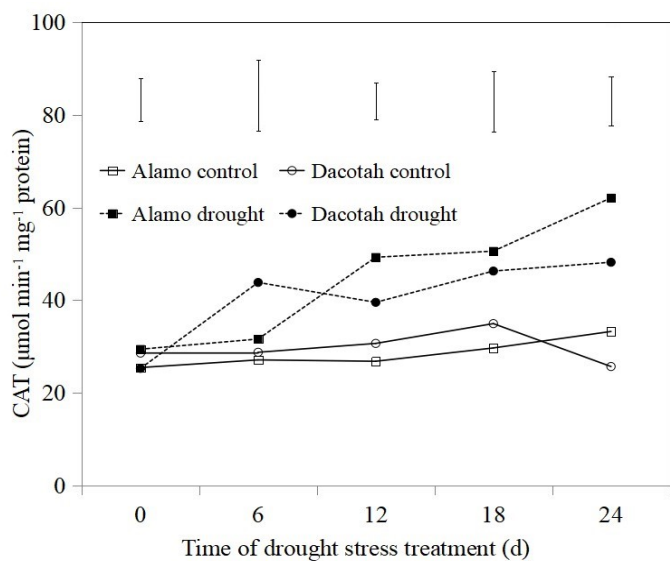

530

531

532

533

534

535

536

537 Fig.7.

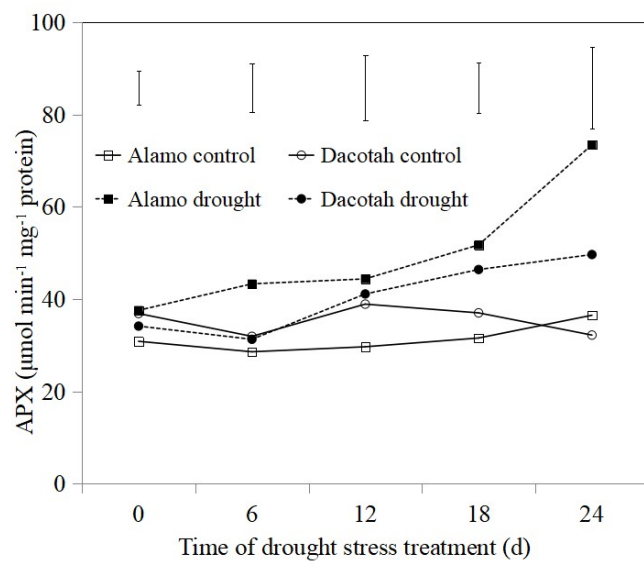

538

539 Fig.8.

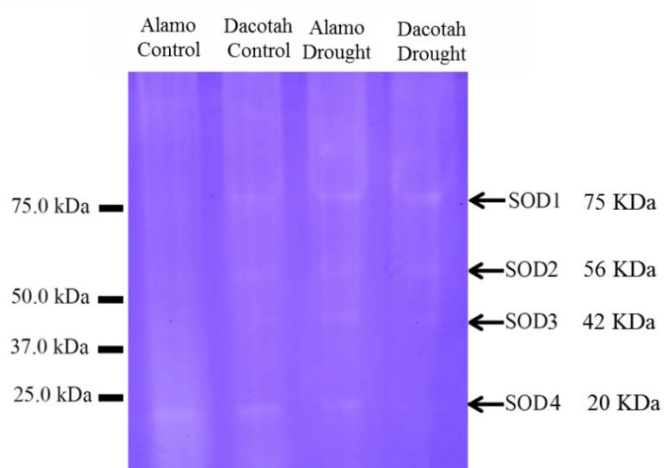

540

541

542

543

544

545

546

547 Fig.9.

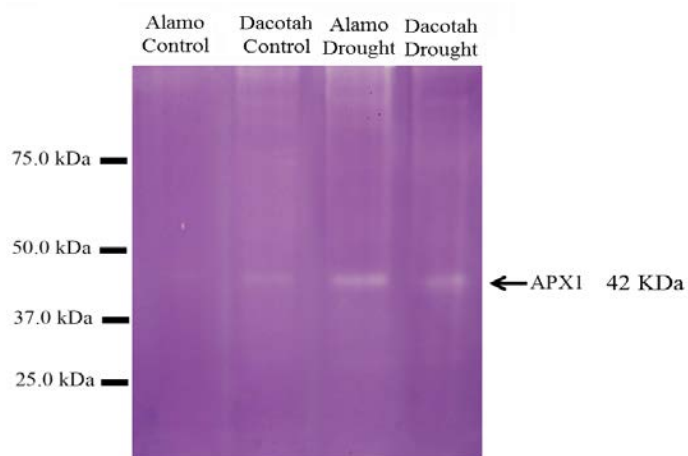

548

549 Fig.10.

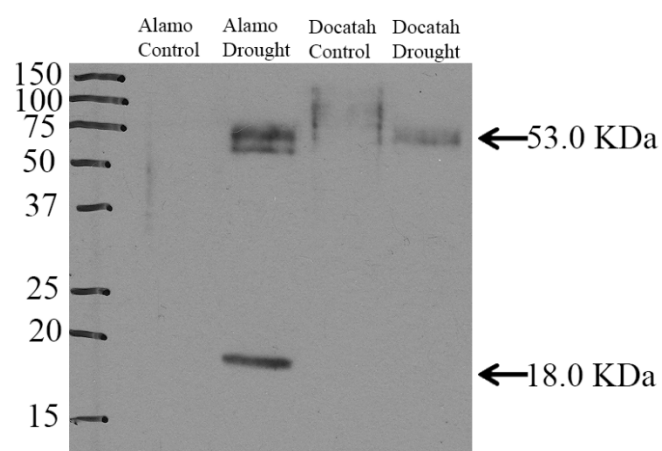

550

551

552

553

554

555

556

557

558 Fig.11.

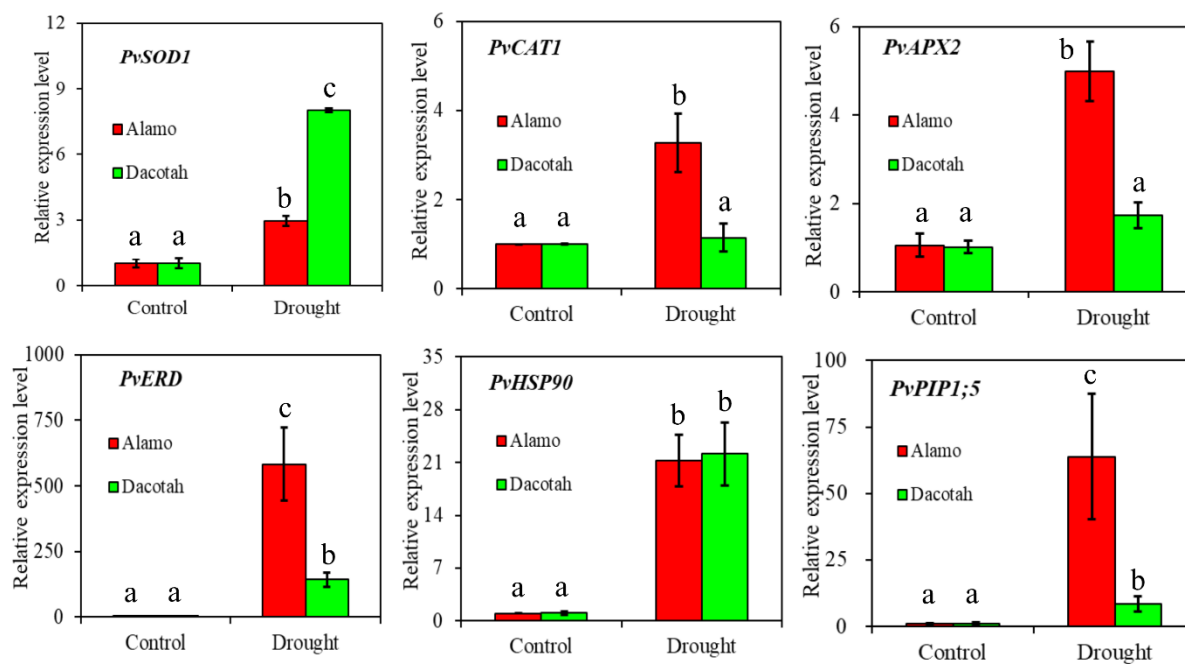

559

560

561
